# Supplementary material
Source: publisher site journal article supplement (https://www.dovepress.com/article/517514)
Supplement: Supplementary file 1 [file 517514%20Supplementary%20Material_.docx]

**Table S 1 . Codes corresponding to each medication and each disease**

| **Correspondence table of each code and ID** | |
| --- | --- |
| **Disease** | **ICD10 code** |
| Hypoglycemia | E110，E140, E160，E161，E162 |
| Diabetes-related complications | E112，E113，E114，E142，E143，E144，N18，N19 |
| Cancers | C00-C14，C15-C26，C30-C39，C40-C41，C43-C44，C45-C49，C50-C50， C51-C58，C60-C63，C64-C68，C69-C72，C73-C75，C76-C80，C81-C96，D00-09 |
| Mental and behavioral disorders | F00-F09 |
| **Drug** | **ATC code** |
| Glucagon | H04B |
| Glucose | V06D |
| Injection of glucose solution  containing more than 20% glucose | K01C |

**Table S 2 . Codes corresponding to each medication**

| **Correspondence table of each code and ID** | |
| --- | --- |
| **Drug** | **ATC code** |
| Biguanide preparations | A10J |
| Human insulin preparations and similar analogs | A10C |
| Glucagon-like peptide-1 agonist preparations | A10S |
| Alpha-glucosidase inhibitors | A10L |
| Thiazolidinedione preparations | A10K |
| Glinide preparations | A10M |
| Sodium-glucose co-transporter 2 inhibitor preparations | A10P |

**Table S 3. Codes corresponding to each examination**

| **Correspondence table of each code and ID** | |
| --- | --- |
| **Examination** | **Standardized medical procedure ID** |
| Hemoglobin A1c（HbA1c） measurement | 160010010 |
| Glucose measurement | 160019410 |
